# Supplementary material for: Y2(Te4O10)(SO4): a new sulfate tellurite with a unique Te4O10 polyanion and large birefringence
Source: Royal Society of Chemistry journal article supplement (doi:10.1039/d0qi01130d), 2020-10-26
Supplement: d0qi01130d1.pdf [file d0qi01130d1.pdf]

# **Y<sub>2</sub>(Te<sub>4</sub>O<sub>10</sub>)(SO<sub>4</sub>): A New Sulfate Tellurite with a Unique Te<sub>4</sub>O<sub>10</sub> Polyanion and Large Birefringence**

Peng-Fei Li<sup>a,c</sup>, Chun-Li Hu<sup>a</sup>, Fang Kong<sup>\*,a</sup>, Shao-Ming Ying<sup>\*,b</sup>, Jiang-Gao Mao<sup>a</sup>

<sup>a</sup> State Key Laboratory of Structural Chemistry, Fujian Institute of Research on the Structure of Matter, Chinese Academy of Sciences, Fuzhou 350002, P. R. China.

<sup>b</sup> Fujian Provincial Key Laboratory of Featured Materials in Biochemical Industry, Ningde Normal University, Ningde 352100, P. R. China

<sup>c</sup> College of Chemical Engineering, Fuzhou University, Fuzhou, Fujian 350116, P. R. China.

E-mail: [kongfang@fjirsm.ac.cn](mailto:kongfang@fjirsm.ac.cn); [ysm@ndnu.edu.cn](mailto:ysm@ndnu.edu.cn)

## **Supporting Information**

|                                                                                                                                                                                                                                                                                                        |           |
|--------------------------------------------------------------------------------------------------------------------------------------------------------------------------------------------------------------------------------------------------------------------------------------------------------|-----------|
| <b>Table S1</b> Calculated bond valences for compounds Y <sub>3</sub> (TeO <sub>3</sub> ) <sub>2</sub> (SO <sub>4</sub> ) <sub>2</sub> (OH)(H <sub>2</sub> O) and Y <sub>2</sub> Te <sub>4</sub> O <sub>10</sub> (SO <sub>4</sub> ). .....                                                             | <b>2</b>  |
| <b>Table S2</b> Band gaps of some reported yttrium tellurites. ....                                                                                                                                                                                                                                    | <b>4</b>  |
| <b>Table S3</b> State energies (eV) of the lowest conduction band and the highest valence band of Y <sub>3</sub> (TeO <sub>3</sub> ) <sub>2</sub> (SO <sub>4</sub> ) <sub>2</sub> (OH)(H <sub>2</sub> O) and Y <sub>2</sub> Te <sub>4</sub> O <sub>10</sub> (SO <sub>4</sub> ). .....                  | <b>4</b>  |
| Computational Method.....                                                                                                                                                                                                                                                                              | <b>5</b>  |
| <b>Figure S1</b> Simulated and experimental powder X-ray diffractometer powder patterns of Y <sub>3</sub> (TeO <sub>3</sub> ) <sub>2</sub> (SO <sub>4</sub> ) <sub>2</sub> (OH)(H <sub>2</sub> O) (a) and Y <sub>2</sub> Te <sub>4</sub> O <sub>10</sub> (SO <sub>4</sub> ) (b). .....                 | <b>6</b>  |
| <b>Figure S2</b> Coordination modes of Y(1) and Y(2) in Y <sub>3</sub> (TeO <sub>3</sub> ) <sub>2</sub> (SO <sub>4</sub> ) <sub>2</sub> (OH)(H <sub>2</sub> O). .....                                                                                                                                  | <b>7</b>  |
| <b>Figure S3</b> Coordination environment of Te(1)O <sub>3</sub> group in Y <sub>3</sub> (TeO <sub>3</sub> ) <sub>2</sub> (SO <sub>4</sub> ) <sub>2</sub> (OH)(H <sub>2</sub> O). .....                                                                                                                | <b>7</b>  |
| <b>Figure S4</b> Coordination modes of Y(1) and Y(2) in Y <sub>2</sub> (Te <sub>4</sub> O <sub>10</sub> )(SO <sub>4</sub> ). .....                                                                                                                                                                     | <b>8</b>  |
| <b>Figure S5</b> (Te <sub>4</sub> O <sub>10</sub> ) <sup>4-</sup> 1D polyanionic chains in Ba <sub>2</sub> (VO <sub>3</sub> )[Te <sub>4</sub> O <sub>9</sub> (OH)] (a), HoCl(Te <sub>2</sub> O <sub>5</sub> ) (b) and Nd <sub>2</sub> (MoO <sub>4</sub> )(Te <sub>4</sub> O <sub>10</sub> ) (c). ..... | <b>8</b>  |
| <b>Figure S6</b> View of the structure of Y <sub>2</sub> (Te <sub>4</sub> O <sub>10</sub> )(SO <sub>4</sub> ) along c-axis. ....                                                                                                                                                                       | <b>9</b>  |
| <b>Figure S7</b> Infrared spectra of Y <sub>3</sub> (TeO <sub>3</sub> ) <sub>2</sub> (SO <sub>4</sub> ) <sub>2</sub> (OH)(H <sub>2</sub> O) (a) and Y <sub>2</sub> (Te <sub>4</sub> O <sub>10</sub> )(SO <sub>4</sub> ) (b). .....                                                                     | <b>10</b> |
| <b>References</b> .....                                                                                                                                                                                                                                                                                | <b>11</b> |

**Table S1** Calculated bond valences for compounds  $Y_3(TeO_3)_2(SO_4)_2(OH)(H_2O)$  and  $Y_2Te_4O_{10}(SO_4)$ .

| Compound                         | Bond         | Bond      | Bond-valence | BVS   |
|----------------------------------|--------------|-----------|--------------|-------|
|                                  |              | lengths   |              |       |
| $Y_3(TeO_3)_2(SO_4)_2(OH)(H_2O)$ | Te(1)-O(1)   | 1.847(5)  | 1.421        | 4.118 |
|                                  | Te(1)-O(2)   | 1.874(4)  | 1.321        |       |
|                                  | Te(1)-O(3)   | 1.859(5)  | 1.376        |       |
|                                  | Y(1)-O(1)#1  | 2.353(5)  | 0.405        | 3.300 |
|                                  | Y(1)-O(1)#2  | 2.353(5)  | 0.405        |       |
|                                  | Y(1)-O(3)    | 2.267(5)  | 0.512        |       |
|                                  | Y(1)-O(3)#3  | 2.267(5)  | 0.512        |       |
|                                  | Y(1)-O(4)    | 2.442(6)  | 0.319        |       |
|                                  | Y(1)-O(5)    | 2.322(7)  | 0.441        |       |
|                                  | Y(1)-O(8)#4  | 2.404(5)  | 0.353        |       |
|                                  | Y(1)-O(8)#5  | 2.404(5)  | 0.353        |       |
|                                  | Y(2)-O(1)#1  | 2.336(4)  | 0.425        |       |
|                                  | Y(2)-O(2)    | 2.401(5)  | 0.356        |       |
|                                  | Y(2)-O(2)#6  | 2.290(5)  | 0.481        |       |
|                                  | Y(2)-O(3)    | 2.405(5)  | 0.352        |       |
|                                  | Y(2)-O(4)    | 2.317(10) | 0.441        |       |
|                                  | Y(2)-O(6)    | 2.449(5)  | 0.313        |       |
|                                  | Y(2)-O(7)#7  | 2.307(5)  | 0.459        |       |
|                                  | Y(2)-O(9)#6  | 2.344(5)  | 0.415        |       |
|                                  | S(1)-O(6)    | 1.487(6)  | 1.448        | 6.102 |
| S(1)-O(7)                        | 1.460(5)     | 1.558     |              |       |
| S(1)-O(8)                        | 1.485(4)     | 1.456     |              |       |
| S(1)-O(9)                        | 1.441(5)     | 1.640     |              |       |
| $Y_2Te_4O_{10}(SO_4)$            | Te(1)-O(1)   | 1.863(7)  | 1.361        | 3.984 |
|                                  | Te(1)-O(2)   | 1.909(8)  | 1.202        |       |
|                                  | Te(1)-O(3)   | 1.847(8)  | 1.421        |       |
|                                  | Te(2)-O(3)#1 | 2.495(8)  | 0.247        | 4.134 |
|                                  | Te(2)-O(4)   | 1.855(7)  | 1.391        |       |
|                                  | Te(2)-O(5)   | 1.864(8)  | 1.357        |       |
|                                  | Te(2)-O(6)   | 1.929(8)  | 1.139        |       |
|                                  | Te(3)-O(6)#2 | 1.943(8)  | 1.096        | 4.021 |
|                                  | Te(3)-O(7)   | 1.863(7)  | 1.361        |       |
|                                  | Te(3)-O(8)   | 1.883(8)  | 1.289        |       |
|                                  | Te(3)-O(9)#3 | 2.454(7)  | 0.275        |       |
|                                  | Te(4)-O(1)#4 | 2.336(8)  | 0.379        | 4.128 |
|                                  | Te(4)-O(2)#5 | 2.020(8)  | 0.890        |       |
|                                  | Te(4)-O(9)   | 1.870(8)  | 1.335        |       |

|              |          |       |       |       |
|--------------|----------|-------|-------|-------|
| Te(4)-O(10)  | 1.821(8) | 1.524 |       |       |
| Y(1)-O(3)#1  | 2.358(8) | 0.400 | 2.962 |       |
| Y(1)-O(4)#6  | 2.354(7) | 0.404 |       |       |
| Y(1)-O(5)    | 2.401(8) | 0.356 |       |       |
| Y(1)-O(7)    | 2.436(8) | 0.324 |       |       |
| Y(1)-O(8)#7  | 2.357(8) | 0.401 |       |       |
| Y(1)-O(9)#3  | 2.473(7) | 0.293 |       |       |
| Y(1)-O(11)   | 2.314(8) | 0.451 |       |       |
| Y(1)-O(12)#3 | 2.426(8) | 0.333 |       |       |
| Y(2)-O(1)#1  | 2.389(8) | 0.368 |       | 3.101 |
| Y(2)-O(4)    | 2.272(7) | 0.505 |       |       |
| Y(2)-O(5)#2  | 2.331(8) | 0.430 |       |       |
| Y(2)-O(7)    | 2.297(7) | 0.472 |       |       |
| Y(2)-O(8)#8  | 2.464(7) | 0.300 |       |       |
| Y(2)-O(9)#9  | 2.441(7) | 0.320 |       |       |
| Y(2)-(10)#10 | 2.148(8) | 0.706 |       |       |
| S(1)-O(11)   | 1.456(8) | 1.575 | 6.108 |       |
| S(1)-O(12)   | 1.487(8) | 1.448 |       |       |
| S(1)-O(13)   | 1.448(9) | 1.609 |       |       |
| S(1)-O(14)   | 1.480(8) | 1.476 |       |       |

Symmetry transformations used to generate equivalent atoms:

For  $Y_3(TeO_3)_2(SO_4)_2(OH)(H_2O)$ : #1  $x-1, y, z$  #2  $x-1, -y+3/2, z$  #3  $x, -y+3/2, z$   
#4  $-x-1, -y+1, -z+1$  #5  $-x-1, y+1/2, -z+1$  #6  $-x, -y+1, -z+2$  #7  $-x-1, -y+1, -z+2$

For  $Y_2Te_4O_{10}(SO_4)$ : #1  $-x+1, -y+1, -z+1$  #2  $-x+1, -y+1, -z+2$  #3  $-x, -y+2, -z+2$   
#4  $x, y+1, z+1$  #5  $x-1, y+1, z+1$  #6  $x-1, y, z$  #7  $-x, -y+1, -z+2$  #8  $x+1, y, z$   
#9  $-x+1, -y+2, -z+2$  #10  $x+1, y-1, z-1$

**Table S2** Band gaps of some reported yttrium tellurites.

| Compounds                                                                                              | Space Group               | E <sub>g</sub> (eV) | Ref.      |
|--------------------------------------------------------------------------------------------------------|---------------------------|---------------------|-----------|
| YVTe <sub>2</sub> O <sub>8</sub>                                                                       | <i>C2/m</i>               | 2.2                 | 8         |
| CsYTe <sub>3</sub> O <sub>8</sub>                                                                      | <i>R-3</i>                | 3.4                 | 6         |
| YNbTe <sub>2</sub> O <sub>8</sub>                                                                      | <i>C2/m</i>               | 3.4                 | 5         |
| RbY(TeO <sub>3</sub> ) <sub>2</sub>                                                                    | <i>Pnma</i>               | 3.6                 | 6         |
| KY(TeO <sub>3</sub> ) <sub>2</sub>                                                                     | <i>Pnma</i>               | 3.8                 | 6         |
| NaYTe <sub>4</sub> O <sub>10</sub>                                                                     | <i>P4<sub>2</sub>/nbc</i> | 3.9                 | 6         |
| Y <sub>2</sub> (Te <sub>4</sub> O <sub>10</sub> )(SO <sub>4</sub> )                                    | <i>P-1</i>                | 4.10                | This work |
| Na <sub>2</sub> Y <sub>3</sub> Cl <sub>3</sub> (TeO <sub>3</sub> ) <sub>4</sub>                        | <i>C2/c</i>               | 4.26                | 7         |
| Y <sub>3</sub> (TeO <sub>3</sub> ) <sub>2</sub> (SO <sub>4</sub> ) <sub>2</sub> (OH)(H <sub>2</sub> O) | <i>P2<sub>1</sub>/m</i>   | 4.40                | This work |

**Table S3** State energies (eV) of the lowest conduction band and the highest valence band of Y<sub>3</sub>(TeO<sub>3</sub>)<sub>2</sub>(SO<sub>4</sub>)<sub>2</sub>(OH)(H<sub>2</sub>O) and Y<sub>2</sub>(Te<sub>4</sub>O<sub>10</sub>)(SO<sub>4</sub>).

| Compound                                                                                                  | k-point                  | L-CB     | H-VB     |
|-----------------------------------------------------------------------------------------------------------|--------------------------|----------|----------|
| Y <sub>3</sub> (TeO <sub>3</sub> ) <sub>2</sub> (SO <sub>4</sub> ) <sub>2</sub><br>(OH)(H <sub>2</sub> O) | Z (0.000, 0.000, 0.500)  | 1.710489 | -0.12089 |
|                                                                                                           | G (0.000, 0.000, 0.000)  | 1.892469 | -0.13787 |
|                                                                                                           | Y (0.000, 0.500, 0.000)  | 1.962409 | -0.15599 |
|                                                                                                           | A (-0.500, 0.500, 0.000) | 2.096052 | -0.00904 |
|                                                                                                           | B (-0.500, 0.000, 0.000) | 2.080662 | 0        |
|                                                                                                           | D (-0.500, 0.000, 0.500) | 1.892063 | -0.01012 |
|                                                                                                           | E (-0.500, 0.500, 0.500) | 1.890435 | -0.02000 |
|                                                                                                           | C (0.000, 0.500, 0.500)  | 1.738010 | -0.14745 |
| Y <sub>2</sub> (Te <sub>4</sub> O <sub>10</sub> )(SO <sub>4</sub> )                                       | G (0.000, 0.000, 0.000)  | 3.659691 | -0.00043 |
|                                                                                                           | F (0.000, 0.500, 0.000)  | 3.845670 | -0.07314 |
|                                                                                                           | Q (0.000, 0.000, 0.500)  | 3.815348 | 0        |
|                                                                                                           | Z (0.000, 0.000, 0.500)  | 3.747897 | -0.06240 |
|                                                                                                           | G (0.000, 0.000, 0.000)  | 3.659691 | -0.00043 |

## Computational Method

Single-crystal structural data of compounds  $Y_3(\text{TeO}_3)_2(\text{SO}_4)_2(\text{OH})(\text{H}_2\text{O})$  and  $Y_2(\text{Te}_4\text{O}_{10})(\text{SO}_4)$  were used for the theoretical calculations. The electronic structures were performed using a plane-wave basis set and pseudo-potentials within density functional theory (DFT) implemented in the total-energy code CASTEP [1]. For the exchange and correlation functional, we chose Perdew–Burke–Ernzerhof (PBE) in the generalized gradient approximation (GGA) [2]. The interactions between the ionic cores and the electrons were described by the ultrasoft pseudopotential [3]. The following valence-electron configurations were considered in the computation: Y- $4d^14p^65s^2$ , Te- $5s^25p^4$ , O- $2s^22p^4$ , S- $3s^23p^4$  and H- $1s^1$ . The numbers of plane waves included in the basis sets were determined by cutoff energy of 750 eV and 340 eV for  $Y_3(\text{TeO}_3)_2(\text{SO}_4)_2(\text{OH})(\text{H}_2\text{O})$  and  $Y_2(\text{Te}_4\text{O}_{10})(\text{SO}_4)$  respectively. The numerical integration of the Brillouin zone was performed using Monkhorst-Pack k-point sampling of  $4 \times 3 \times 3$  for  $Y_3(\text{TeO}_3)_2(\text{SO}_4)_2(\text{OH})(\text{H}_2\text{O})$  and  $Y_2(\text{Te}_4\text{O}_{10})(\text{SO}_4)$  respectively. The other parameters and convergent criteria were the default values of CASTEP code.

The calculations of linear optical properties in terms of the complex dielectric function  $\varepsilon(\omega) = \varepsilon_1(\omega) + i\varepsilon_2(\omega)$  were made. The imaginary part of the dielectric function  $\varepsilon_2$  was given in the following equation:

$$\varepsilon_{ij}^2(\omega) = \frac{8\pi^2 h^2 e^2}{(m^2 V)} \sum_k \sum_{cv} (f_c - f_v) \frac{p_{cv}^i(k) p_{cv}^j(k)}{E_{vc}^2} \delta [E_c(k) - E_v(k) - \hbar\omega]$$

The  $f_c$  and  $f_v$  represent the Fermi distribution functions of the conduction and valence band. The term  $p_{cv}^i(k)$  denotes the momentum matrix element transition from the energy level  $c$  of the conduction band to the level  $v$  of the valence band at the  $k$ th point in the Brillouin zone (BZ), and  $V$  is the volume of the unit cell.

The real part  $\varepsilon_1(\omega)$  of the dielectric function  $\varepsilon(\omega)$  follows from the Kramer–Kronig relationship. All the other optical constants may be derived from  $\varepsilon_1(\omega)$  and  $\varepsilon_2(\omega)$ . For

example, the refractive index  $n(\omega)$  can be calculated using the following expression[4]:

$$n(\omega) = \frac{1}{\sqrt{2}} [\sqrt{\varepsilon_1^2(\omega) + \varepsilon_2^2(\omega)} + \varepsilon_1(\omega)]^{1/2}$$

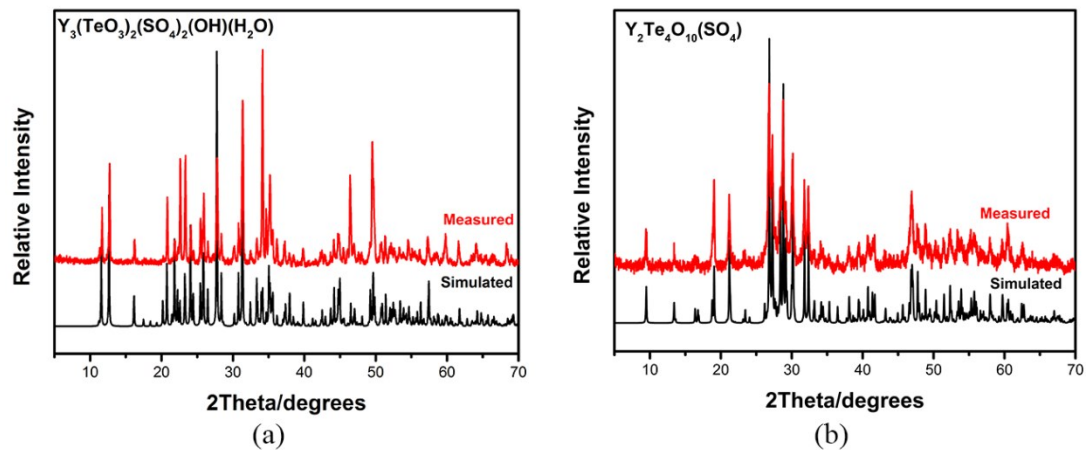

**Figure S1.** Simulated and experimental powder X-ray diffractometer patterns of  $Y_3(TeO_3)_2(SO_4)_2(OH)(H_2O)$  (a) and  $Y_2(Te_4O_{10})(SO_4)$  (b).

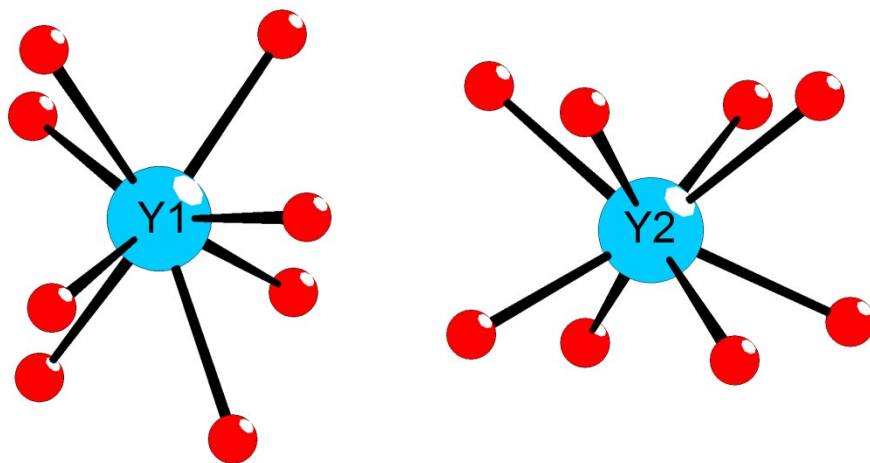

**Figure S2** Coordination modes of Y(1) and Y(2) in  $Y_3(TeO_3)_2(SO_4)_2(OH)(H_2O)$ .

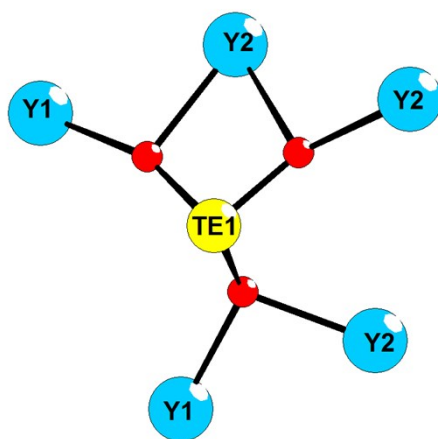

**Figure S3** Coordination environment of Te(1)O<sub>3</sub> group in  $Y_3(TeO_3)_2(SO_4)_2(OH)(H_2O)$ .

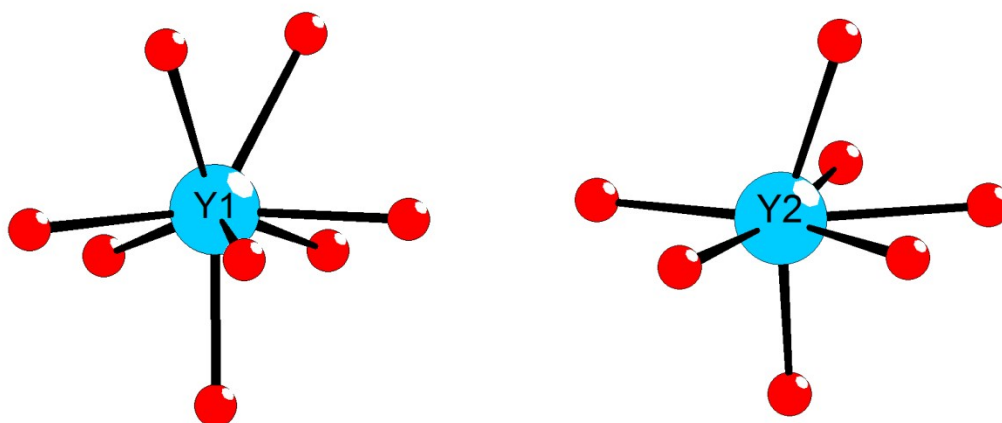

**Figure S4** Coordination modes of Y(1) and Y(2) in  $Y_2(Te_4O_{10})(SO_4)$ .

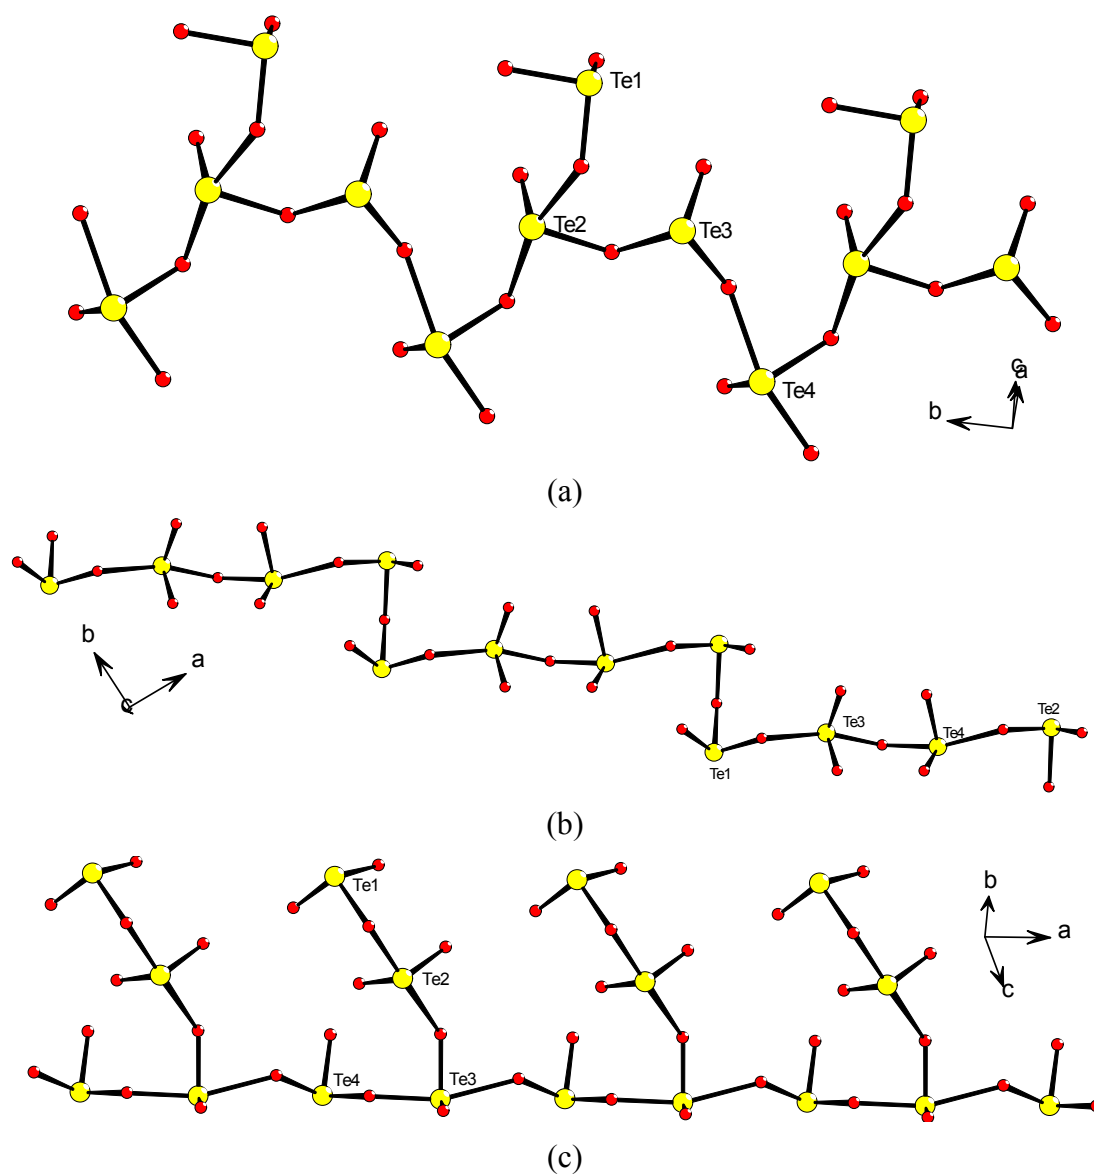

**Figure S5**  $(Te_4O_{10})^{4-}$  1D polyanionic chains in  $Ba_2(VO_3)[Te_4O_9(OH)]$  (a),  $HoCl(Te_2O_5)$  (b) and  $Nd_2(MoO_4)(Te_4O_{10})$  (c).



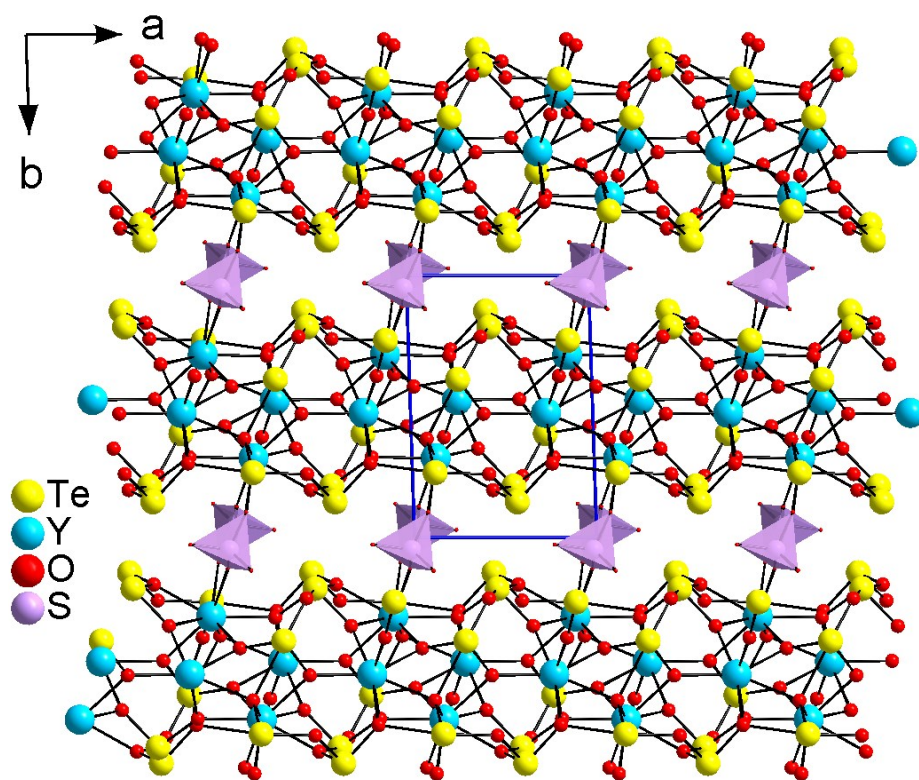

**Figure S6** View of the structure of  $Y_2(Te_4O_{10})(SO_4)$  along c-axis.

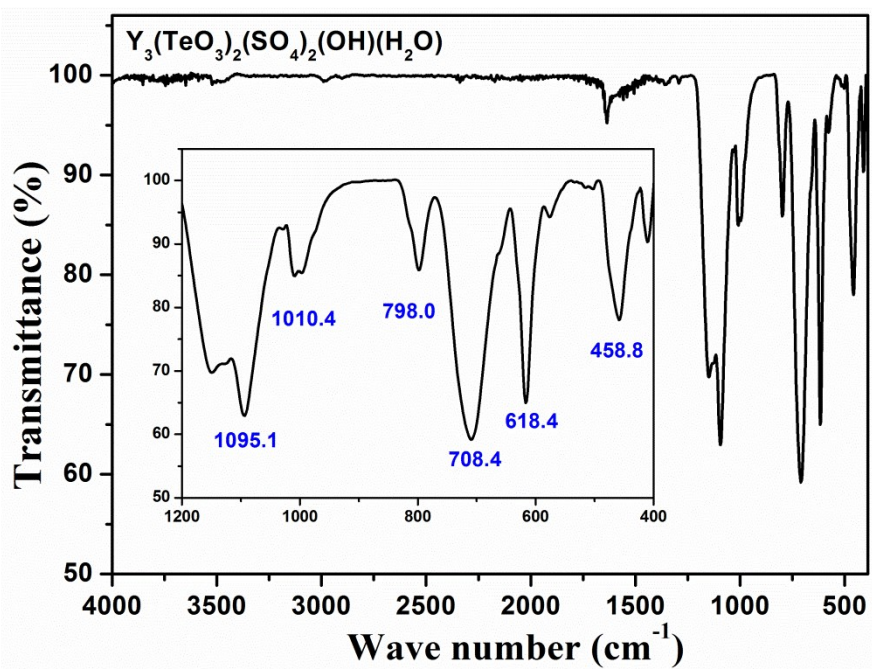

(a)

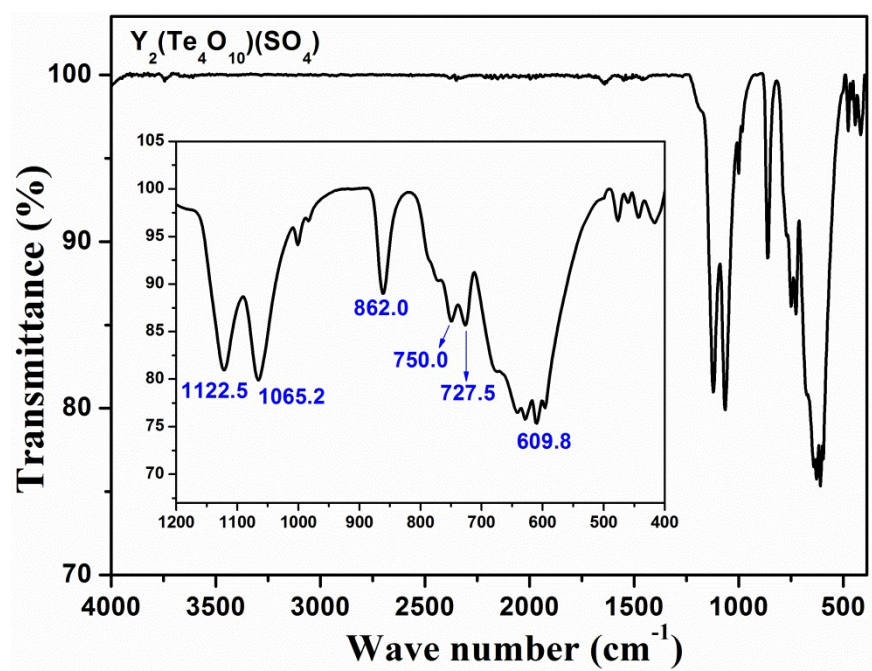

(b)

**Figure S7.** IR spectra of Y<sub>3</sub>(TeO<sub>3</sub>)<sub>2</sub>(SO<sub>4</sub>)<sub>2</sub>(OH)(H<sub>2</sub>O) (a) and Y<sub>2</sub>(Te<sub>4</sub>O<sub>10</sub>)(SO<sub>4</sub>) (b).

## References

- [1] M. D. Segall, P. J. D. Lindan, M. J. Probert, C. J. Pickard, P. J. Hasnip, S. J. Clark and M. C. J. Payne, First-principles simulation: ideas, illustrations and the CASTEP code, *Phys-Condens Mat.*, 2002, **14**, 2717.
- [2] V. Milman, B. Winkler, J. A. White, C. J. Pickard, M. C. Payne, E. V. Akhmatkaya and R. H. Nobes, Electronic structure, properties, and phase stability of inorganic crystals: A pseudopotential plane-wave study, *Int. J. Quantum. Chem.*, 2000, **77**, 895-910.
- [3] J. P. Perdew, K. Burke and M. Ernzerhof, Generalized Gradient Approximation Made Simple, *Phys. Rev. Lett.*, 1996, **77**, 3865.
- [4] S. Saha and T. P. Sinha, Electronic structure, chemical bonding, and optical properties of paraelectric BaTiO<sub>3</sub>, 2000, **62**, 8828-8834.
- [5] Y. H. Kim, B. Y. Jeon, T. S. You and K. M. Ok, New quaternary oxides with both families of second-order Jahn–Teller (SOJT) distortive cations: Solid-state synthesis, structure determination, and characterization of YNbTe<sub>2</sub>O<sub>8</sub> and YNbSe<sub>2</sub>O<sub>8</sub>, *J. Alloy. Compd.*, 2015, **637**, 155-161.
- [6] Y. Kim, D. W. Lee and K. M. Ok, Rich Structural Chemistry in New Alkali Metal Yttrium Tellurites: Three-Dimensional Frameworks of NaYTe<sub>4</sub>O<sub>10</sub>, KY(TeO<sub>3</sub>)<sub>2</sub>, RbY(TeO<sub>3</sub>)<sub>2</sub>, and a Novel Variant of Hexagonal Tungsten Bronze, CsYTe<sub>3</sub>O<sub>8</sub>, *Inorg. Chem.*, 2015, **54**, 389-395.
- [7] S. Zitzer, F. Schleifenbaum and T. Schleid, Na<sub>2</sub>Y<sub>3</sub>Cl<sub>3</sub>[TeO<sub>3</sub>]<sub>4</sub>: Synthesis, Crystal Structure and Spectroscopic Properties of the Bulk Material and its Luminescent Eu<sup>3+</sup>-doped Samples, *Z. Naturforsch.*, 2014, **69**, 150-158.
- [8] Y. H. Kim, D. W. Lee and K. M. Ok, Noncentrosymmetric YVSe<sub>2</sub>O<sub>8</sub> and Centrosymmetric YVTe<sub>2</sub>O<sub>8</sub>: Macroscopic Centricities Influenced by the Size of Lone Pair Cation Linkers, *Inorg. Chem.*, 2014, **53**, 1250-1256.
